# Supplementary material for: Structural basis of the mycobacterial stress-response RNA polymerase auto-inhibition via oligomerization
Source: PubMed Central journal article supplement (PMC9886945; doi:10.1038/s41467-023-36113-y), 2023-01-30
Supplement: 41467_2023_36113_MOESM1_ESM.pdf [file 41467_2023_36113_MOESM1_ESM.pdf]

**Supplementary information**

**Structural basis of the mycobacterial stress-response RNA polymerase auto-inhibition via oligomerization**

Morichaud et al.

**Supplementary Table 1 Cryo-EM data collection, refinement and validation statistics**

|                                                     | Octamer<br><i>D</i> <sub>4</sub> -map | Protomer  | Dimer     | Dimer<br>class 1 | Dimer<br>class 2 | Core      | Octamer<br><i>D</i> <sub>4</sub> -map | Protomer  |
|-----------------------------------------------------|---------------------------------------|-----------|-----------|------------------|------------------|-----------|---------------------------------------|-----------|
| <b>Data collection</b>                              |                                       |           |           |                  |                  |           |                                       |           |
| Pixel size (Å)                                      | 1.1                                   |           |           |                  |                  |           |                                       |           |
| Voltage (kV)                                        | 300                                   |           |           |                  |                  |           |                                       |           |
| Electron dose<br>(e <sup>-1</sup> Å <sup>-2</sup> ) | 49.6                                  |           |           |                  |                  |           |                                       |           |
| Defocus range<br>(μm)                               | 0.5 - 5                               |           |           |                  |                  |           |                                       |           |
| <b>Reconstruction<br/>software</b>                  | CryoSPARC                             |           |           |                  |                  |           | RELION                                |           |
| Total particles                                     | 254 380                               | 254 380   | 254 380   | 254 380          | 254 380          | 721 752   | 157 386                               | 753 528   |
| Particles used in<br>reconstruction                 | 115 457                               | 115 112   | 115 112   | 66 519           | 48 593           | 55 008    | 94 191                                | 267 457   |
| Symmetry<br>imposed                                 | <i>D</i> <sub>4</sub>                 | -         | -         | -                | -                | -         | <i>D</i> <sub>4</sub>                 | -         |
| Map resolution<br>(Å) FSC threshold<br>0.143        | 4.4                                   | 3.84      | 4.36      | 4.38             | 6.75             | 4.08      | 6.3                                   | 3.86      |
| <b>Refinement</b>                                   |                                       |           |           |                  |                  |           |                                       |           |
| Resolution FSC<br>threshold 0.5                     | 9.00                                  | 4.00      | 5.42      | -                | -                | 4.39      | -                                     | 3.9       |
| Map CC<br>(whole map)                               | 0.52                                  | 0.8       | 0.69      | -                | -                | 0.72      | -                                     | 0.84      |
| Map CC (peaks)                                      | 0.46                                  | 0.77      | 0.65      | -                | -                | 0.69      | -                                     | 0.75      |
| <b>RMSD</b>                                         |                                       |           |           |                  |                  |           |                                       |           |
| Bond length (Å)                                     | 0.003                                 | 0.002     | 0.003     | -                | -                | 0.003     | -                                     | 0.007     |
| Bond angle (°)                                      | 0.555                                 | 0.483     | 0.633     | -                | -                | 0.525     | -                                     | 1.010     |
| <b>Ramachandran plot</b>                            |                                       |           |           |                  |                  |           |                                       |           |
| Preferred regions<br>(%)                            | 96.45                                 | 96.68     | 96.42     | -                | -                | 95.90     | -                                     | 94.34     |
| Allowed regions<br>(%)                              | 3.55                                  | 3.32      | 3.58      | -                | -                | 4.03      | -                                     | 5.66      |
| Outliers (%)                                        | 0.00                                  | 0.00      | 0.00      | -                | -                | 0.07      | -                                     | 0.00      |
| <b>Validation</b>                                   |                                       |           |           |                  |                  |           |                                       |           |
| MolProbity score                                    | 1.56                                  | 1.50      | 1.56      | -                | -                | 1.56      | -                                     | 2.50      |
| All-atom<br>clashscore                              | 5.90                                  | 5.44      | 5.91      | -                | -                | 5.19      | -                                     | 10.37     |
| Rotamer outliers<br>(%)                             | 0.71                                  | 0.39      | 0.70      | -                | -                | 0.37      | -                                     | 5.77      |
| EM accession                                        | EMD-<br>13817                         | EMD-13579 | EMD-13829 | EMD-14378        | EMD-14974        | EMD-14560 | EMD-14697                             | EMD-14696 |
| PDB accession                                       | 7Q4U                                  | 7PP4      | 7Q59      | -                | -                | 7Z8Q      | -                                     | 7ZF2      |

FSC, Fourier shell correlation; RMSD, root mean square deviation

**Supplementary Table 2 Sequences of primers used for DNA amplification and cloning**

| Primer name                      | Primer sequence 5'→ 3'                                                         | Product                                                                                    |
|----------------------------------|--------------------------------------------------------------------------------|--------------------------------------------------------------------------------------------|
| SigAP_forw                       | [6FAM]CACTGAAACTTGCCCGCTC                                                      | 106 bp <i>sigAP</i> promoter fragment labeled at the 5' end of non-template DNA strand     |
| SigAP_rev                        | GCGTTGATATCAGCGTGAAT                                                           |                                                                                            |
| SigAP_TGTG +2G-Cy3 forw          | CACTGAAACTTGCCCGCTCGGGCTGTACTCGTGCGCAGT<br>TGTGTTACAATGGTCAGC[G-Cyanine3]GCGGC | 106 bp <i>sigAP</i> promoter fragment internally labeled at +2G of non-template DNA strand |
| SigAP_TGTG rev                   | GCGTTGATATCAGCGTGAATACTCGCGCGCTATCGGTCCG<br>GCGGCCGCCGCTGACCATTGTAACACAACCTGCG |                                                                                            |
| CarD cloning <i>NdeI</i> forw    | ggcagcatATGATTTTCAAGGTCGGAGACACCG                                              | 486 nt CarD gene (Rv3583c)                                                                 |
| CarD cloning <i>Hind III</i> rev | gtcgcaagctttAAGACGCGGCGGCTAAAACCTC                                             |                                                                                            |

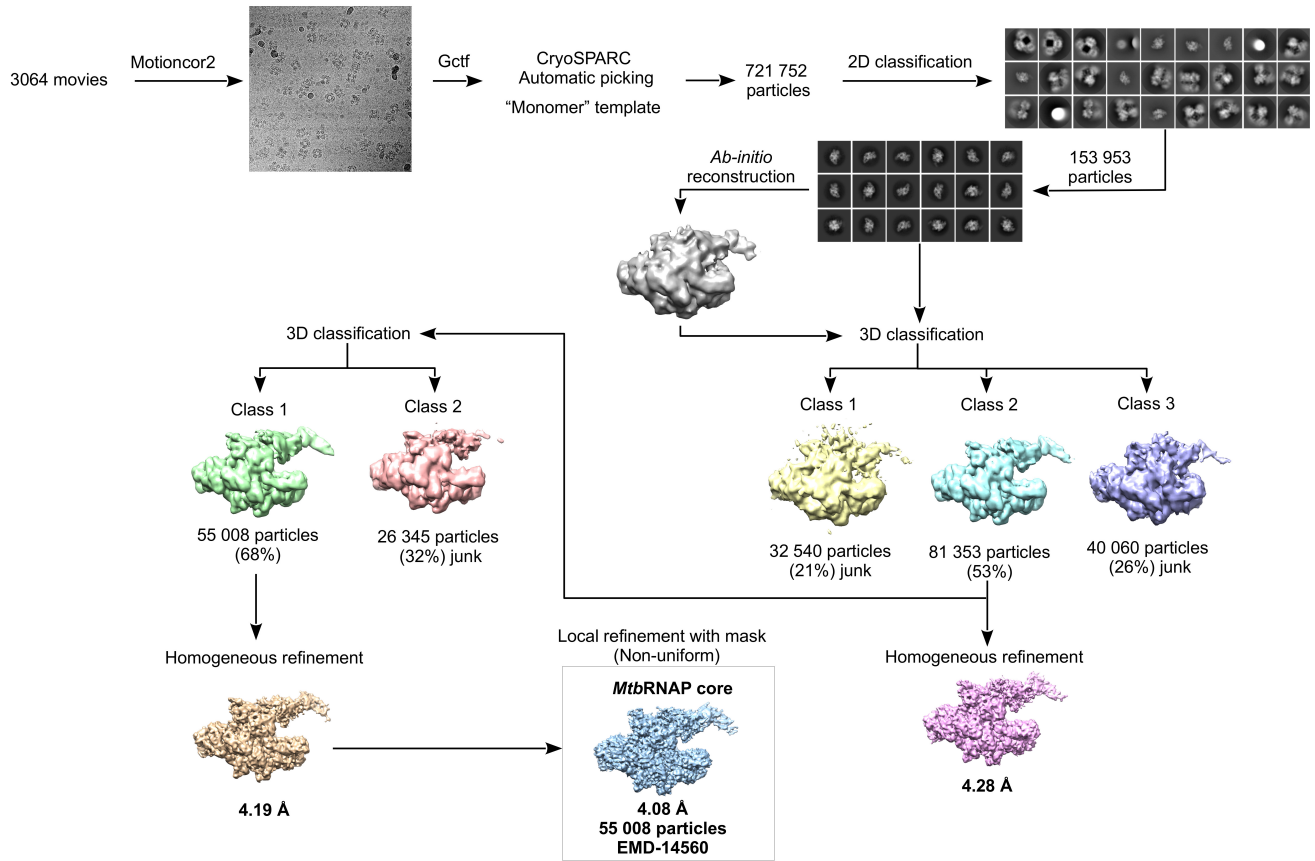

**Supplementary Figure 1. The cryo-EM data processing pipeline for the *M. tuberculosis* RNAP core**



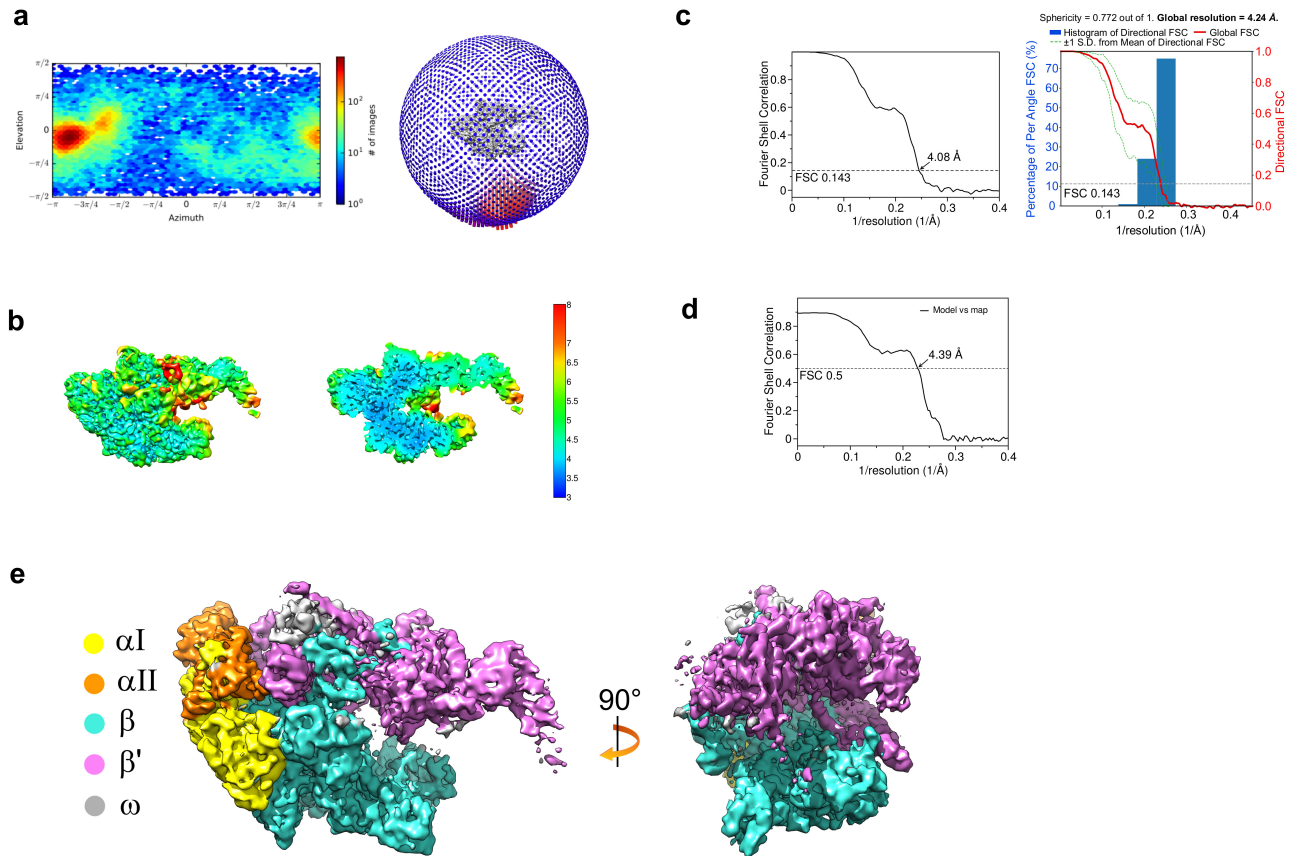

**Supplementary Figure 2. The cryo-EM structure of the *M. tuberculosis* RNAP core.** **a** Heat map and spherical presentation of the angular distributions for particles projections calculated in cryoSPARC. **b** Cryo-EM density map and sliced map (on the right) colored according to the local resolution. **c** Gold-standard Fourier Shell Correlation (FSC) calculated for the cryo-EM map in cryoSPARC. The dotted line shows the 0.143 FSC cutoff. Histogram (blue) and directional FSC Plot (red line) calculated for the cryo-EM map using on-line application at <https://3dfsc.salk.edu/><sup>1</sup>. **d** Gold-standard FSC calculated for the model vs. full-map using the MTRIAGE module of Phenix (right). The dotted line shows the 0.5 FSC cutoff. **e** Views on the cryo-EM density map of the Mtb RNAP core. The RNAP subunits color-coded as indicated on the left.

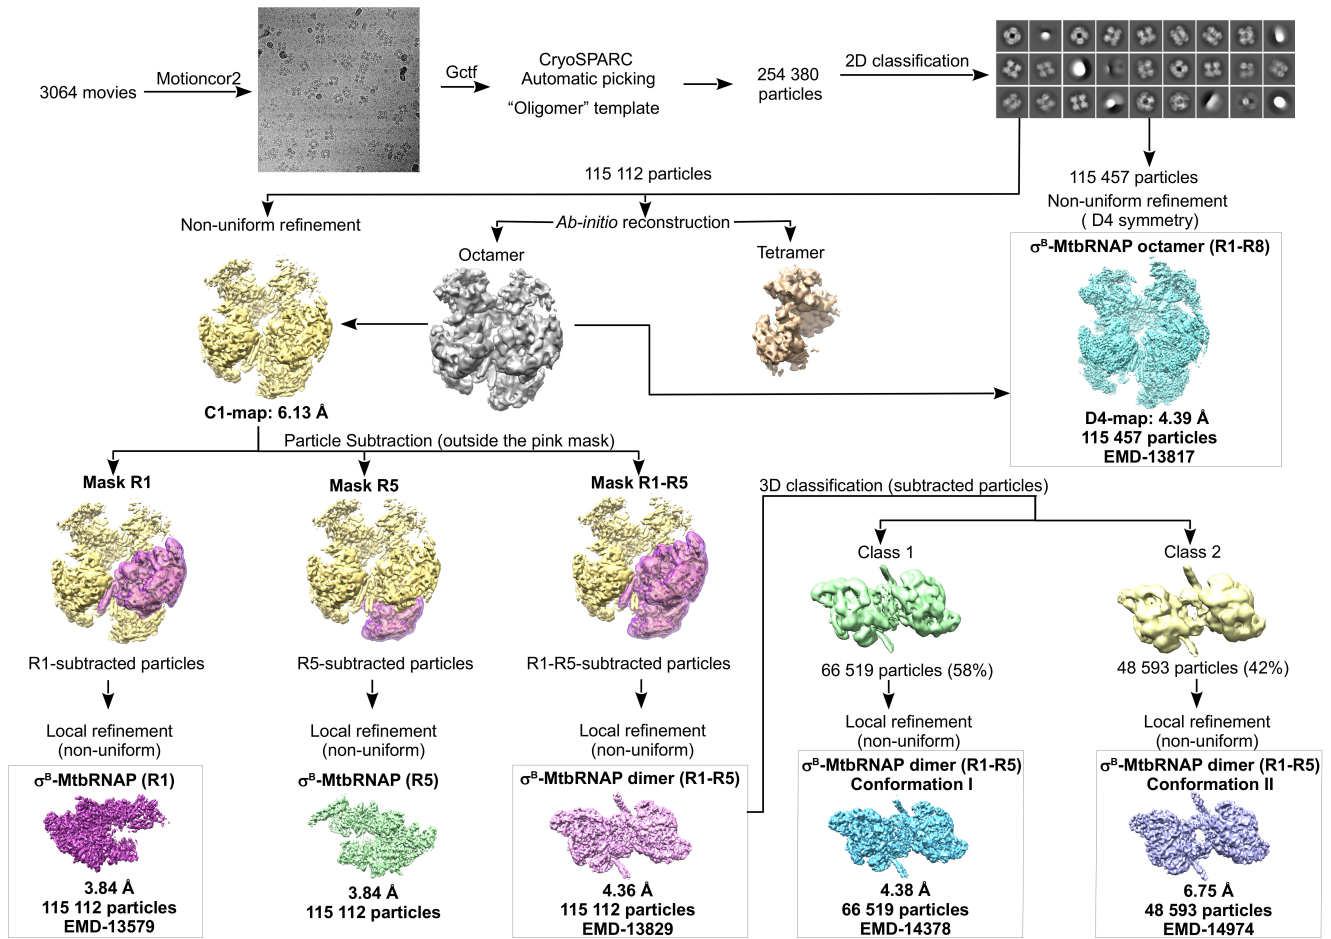

Supplementary Figure 3. The cryo-EM data processing pipeline for *M. tuberculosis*  $E\sigma^B$

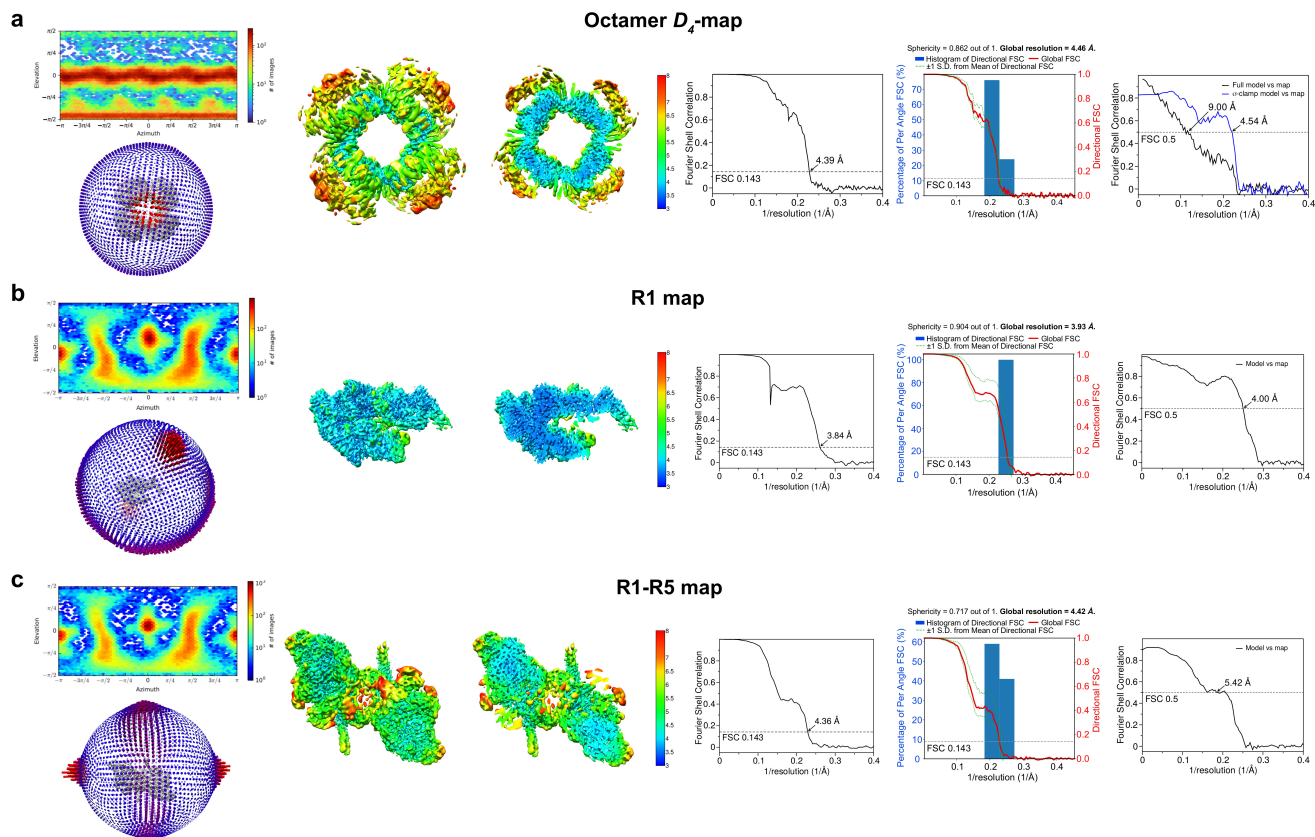

**Supplementary Figure 4. *M. tuberculosis*  $E\sigma^B$  octamer, monomer and dimer. a  $E\sigma^B$  octamer. b  $E\sigma^B$  R1 protomer. c  $E\sigma^B$  R1-R5 dimer. From left to right: angular distributions for particles projections calculated in cryoSPARC and presented as a heat map and as a sphere: Cryo-EM density maps and sliced maps (on the right) colored according to the local resolution. Gold-standard FSC calculated for the map in cryoSPARC. The dotted line shows the 0.143 FSC cutoff. Histogram (blue) and directional FSC Plot (red line) calculated for the cryo-EM map using on-line application at <https://3dfsc.salk.edu/><sup>1</sup>. Gold-standard FSC calculated for the model vs. full-map using the MTRIAGE module of Phenix (right). The dotted line shows the 0.5 FSC cutoff.**

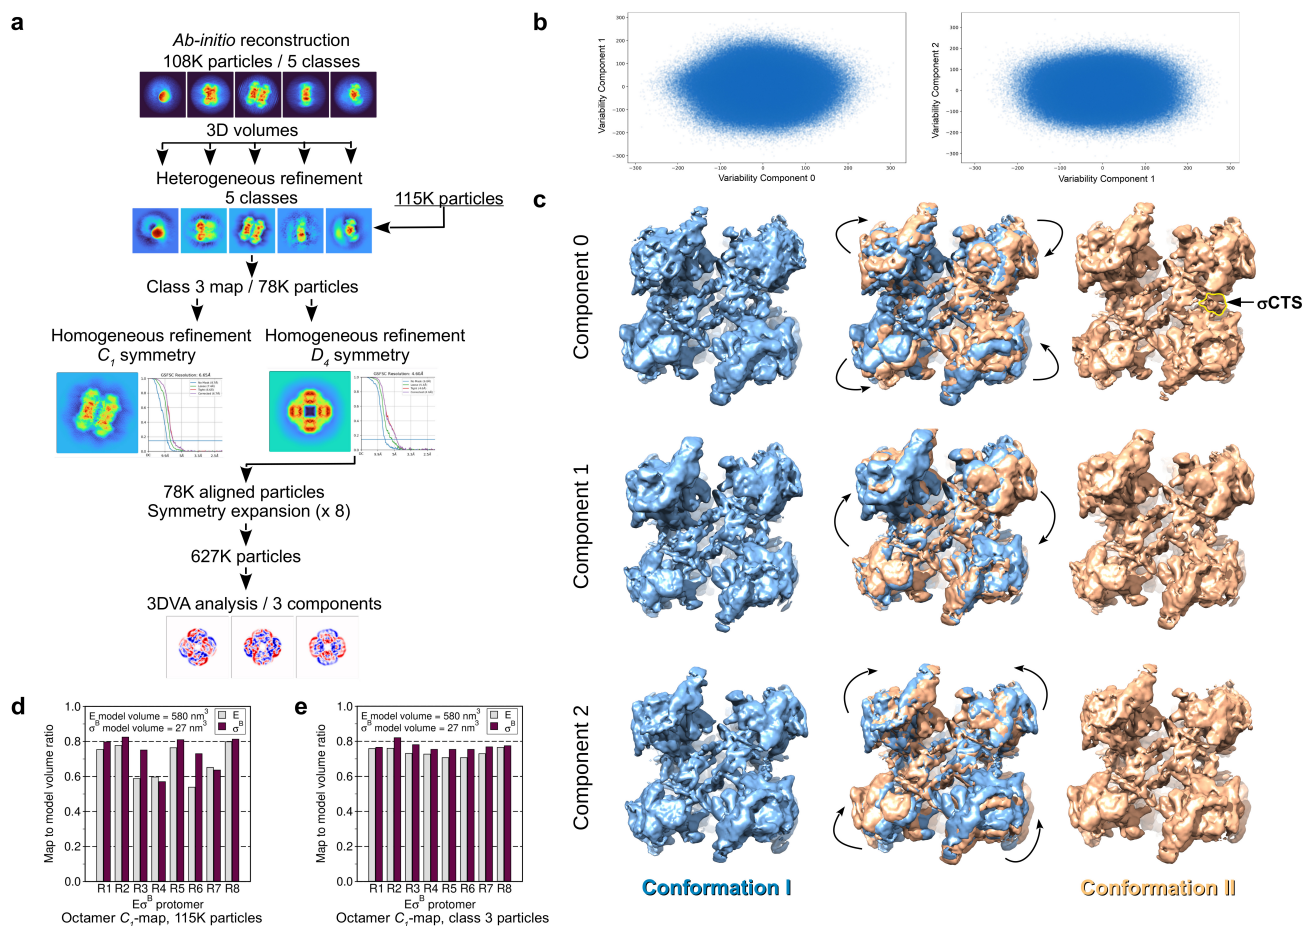

**Supplementary Figure 5. Conformational heterogeneity of the  $E\sigma^B$  octamer.** **a** Workflow of the 3D variability analysis (3DVA) performed in cryoSPARC. First, a set of 105K particles was used in reference-free *ab-initio* heterogeneous reconstruction to produce five initial models. Next, a dataset of 115K particles and five initial models were used as input for 3D heterogeneous refinement aimed to remove junk particles and to select a clean stack of particles of the RNAP octamer. Afterwards, the class 3 particles and map were used in homogeneous refinement with imposed  $D_4$  symmetry. Aligned particles from the homogeneous refinement job were symmetry expanded and used in 3DVA with 3 components (panels **b**, **c**). **b** 2D-scatter plots of particles coordinates distribution over 3 components. **c** 3D density maps generated by 3DVA along each variability component. Density of the  $\sigma^B$  C-terminal segment ( $\sigma^B$ CTS) is indicated by arrow and by yellow contour line. **d**, **e** Bar graphs show relative volumes of the  $\sigma^B$  domain and core RNAP densities in R1 - R8 protomers of the octamer  $C_7$ -map. Values are the ratios of the map volume to the volume of the molecular model. Cryo-EM maps were refined using a full set of 115K particles (**d**) and cleaned set of 78K particles (**e**) derived from the heterogeneous refinement job shown in panel (**a**). Volumes were calculated in UCSF Chimera after the splitting the Cryo-EM maps by Segger<sup>2</sup>

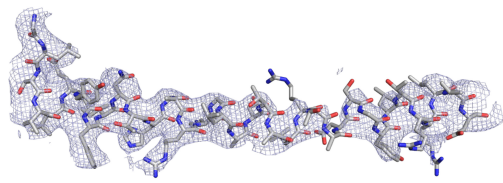

$\beta'$  bridge helix (843-879)

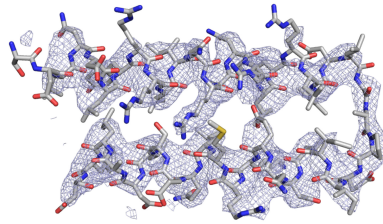

$\beta'$  coiled-coil (338-383)

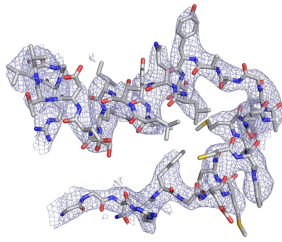

$\beta$ a15 (1064-1100)

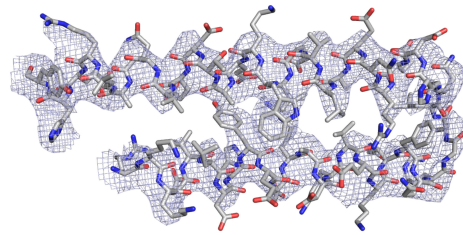

$\beta'$ a13-a14/rim helices (741-793)

**Supplementary Figure 6. *M. tuberculosis*  $E\sigma^B$  R1 protomer.** Sample density maps and molecular models of the *M. tuberculosis*  $E\sigma^B$  structural elements.



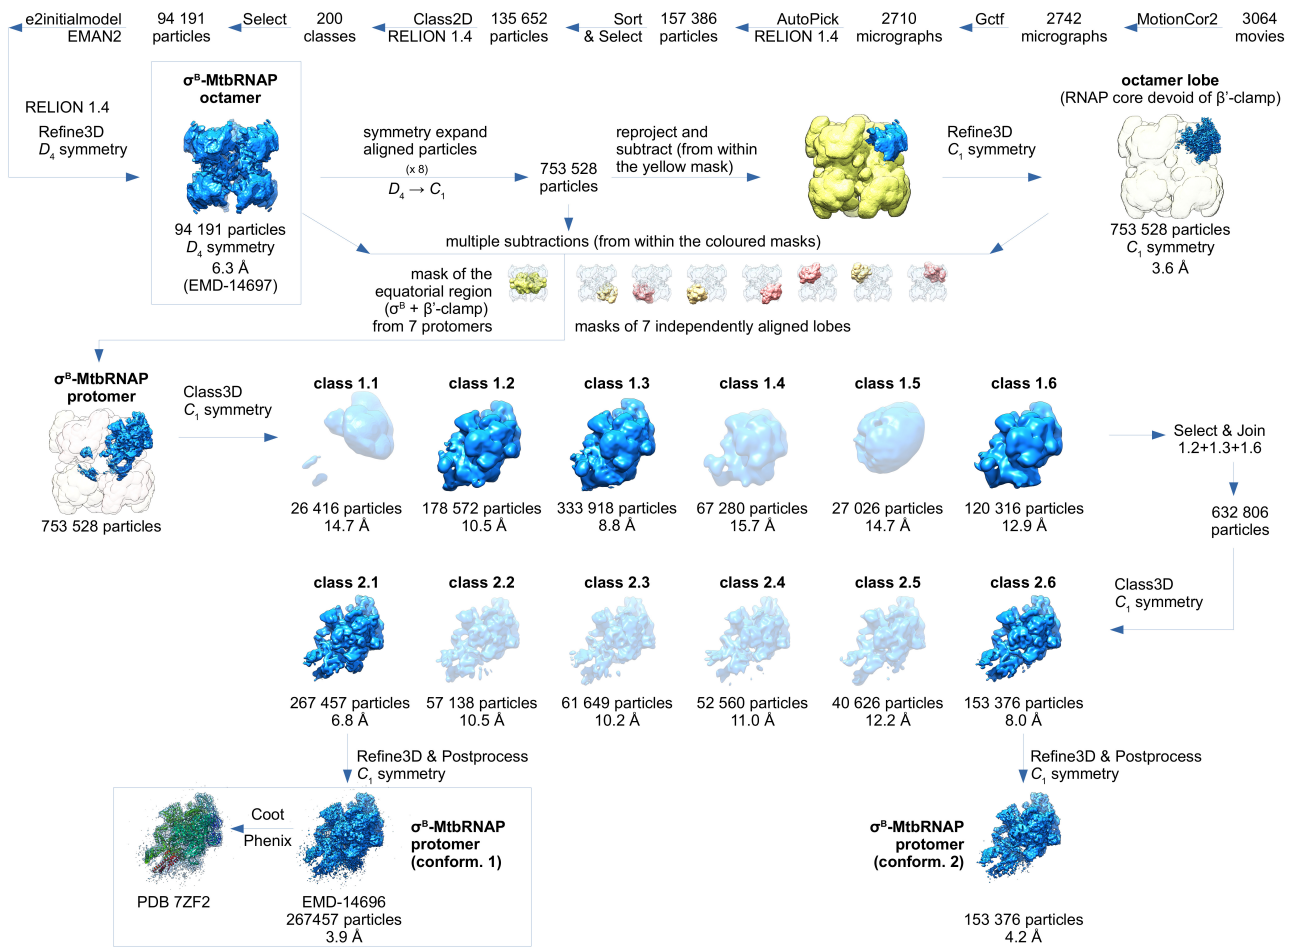

**Supplementary Figure 7. Alternative cryo-EM data processing pipeline for *M. tuberculosis*  $E\sigma^B$  using RELION**

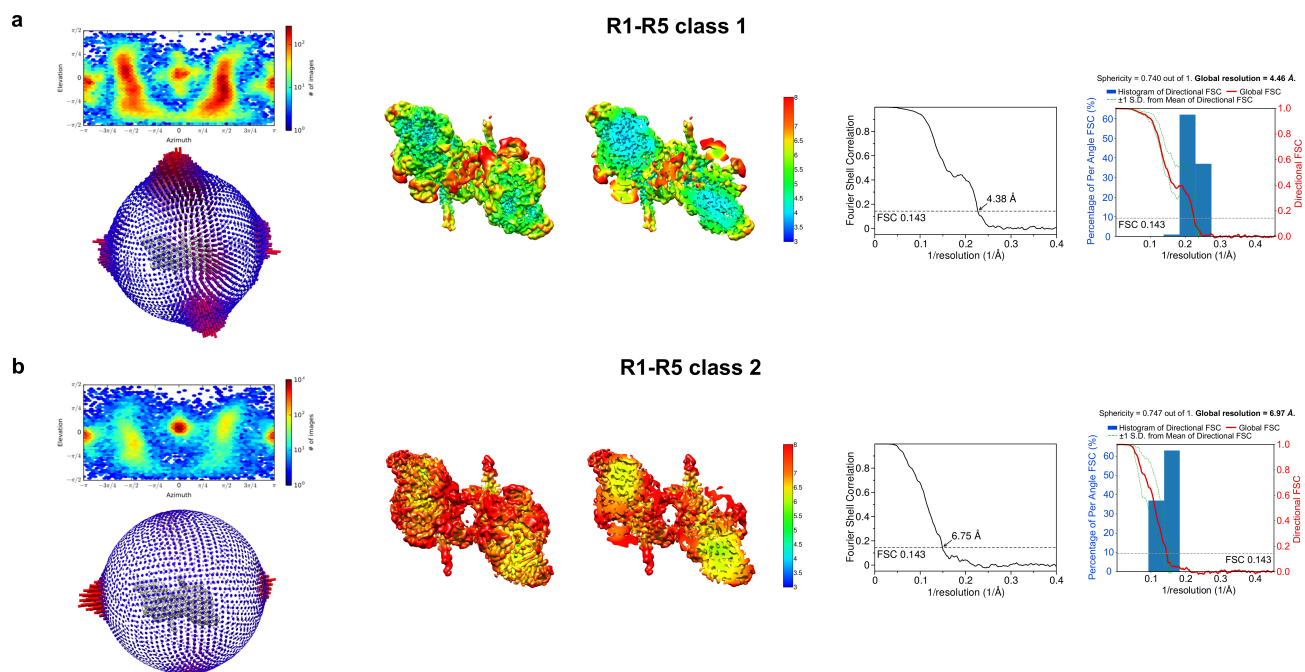

**Supplementary Figure 8. Two conformations of the  $E\sigma^B$  dimer. a**  $E\sigma^B$  R1-R5 dimer conformation I (3D class 1). **b**  $E\sigma^B$  R1-R5 dimer conformation II (3D class 2). From left to right: angular distributions for particles projections calculated in cryoSPARC and presented as a heat map and as a sphere. Cryo-EM density maps and sliced maps (on the right) colored according to the local resolution. Gold-standard FSC calculated for the map in cryoSPARC. Dotted line shows the 0.143 FSC cutoff. Histogram (blue) and directional FSC Plot (red line) calculated for the cryo-EM map using on-line application at <https://3dfsc.salk.edu/><sup>1</sup>. Gold-standard FSC calculated for the model vs. full-map using the MTRIAGE module of Phenix (right). The dotted line shows the 0.5 FSC cutoff.

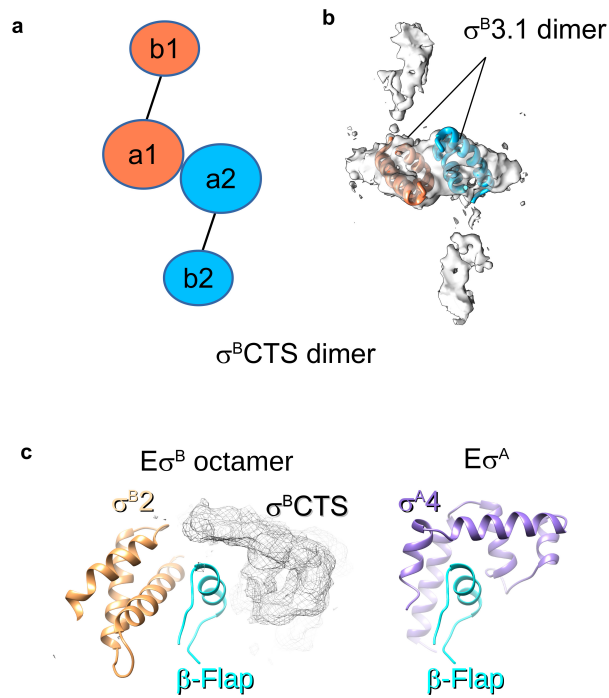

**Supplementary Figure 9. The C-terminal segment of  $\sigma^B$ .** **a** Schematic representation of the two stacked  $\sigma^B$  C-terminal segments ( $\sigma^B$  CTS) in the R1-R5 ( $E\sigma^B$ )<sub>2</sub> dimer. Each  $\sigma^B$  CTS is depicted as two connected ellipsoids. The  $\sigma^B$  CTS assigned to the R1 RNAP protomer is colored in coral (a1-b1) and the  $\sigma^B$  CTS assigned to the R5 RNAP protomer (a2-b2) is in deep sky blue. **b** Cryo-EM density of the two stacked  $\sigma^B$  CTS in the R1-R5 ( $E\sigma^B$ )<sub>2</sub> dimer with the fitted model of the  $\sigma^B$  subregion 3.1 dimer (residues 162-212, shown as ribbons). The  $\sigma^B$  monomers are colored as in panel B. **c** Environment of the  $\beta$  flap in the  $E\sigma^B$  octamer (left) and in  $E\sigma^A$  (right). The unresolved density of the  $\sigma^B$  C-terminal segment ( $\sigma^B$  CTS) is shown as a mesh. The  $\sigma^B$  domain  $\sigma^2$  and the  $\sigma^A$  domain  $\sigma^4$  are shown as ribbons.



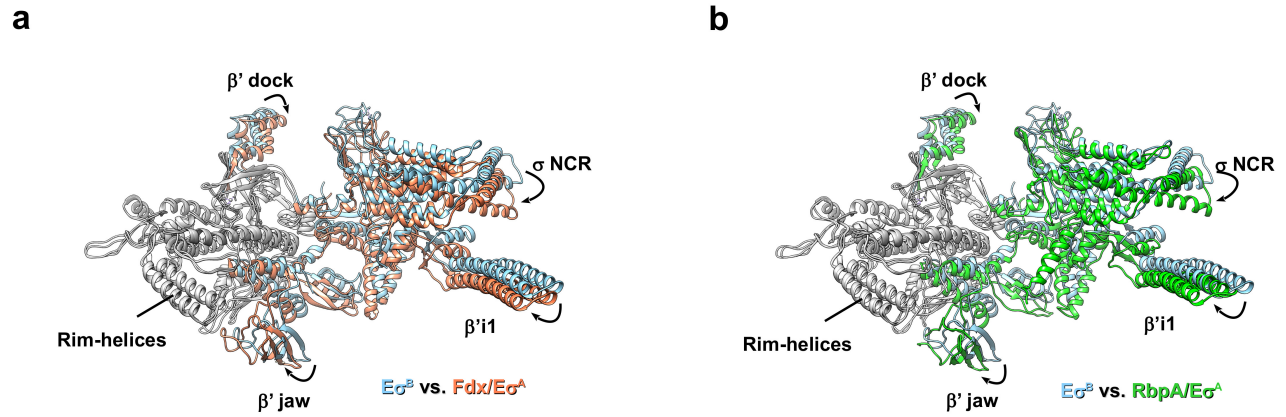

**Supplementary Figure 10. Conformational changes in  $E\sigma^B$ .** **a** Superposition of the  $\beta'$  subunit domains:  $\beta'i1$  (a.a. 141-230),  $\beta'jaw$  (a.a. 1037-1116),  $\beta' dock$  ( $\beta'a11$ , aa 440-495)<sup>3</sup>, and  $\sigma^BNCR$  in  $E\sigma^B$  with those of  $E\sigma^A$  in complex with the antibiotic Fdx (PDB ID 6FBV). **b** Superposition of the  $\beta'$  subunit domains:  $\beta'i1$  (a.a. 141-230),  $\beta'jaw$  (a.a. 1037-1116), and  $\sigma^BNCR$  in  $E\sigma^B$  with those in RbpA/ $E\sigma^A$  (PDB ID 6C05).

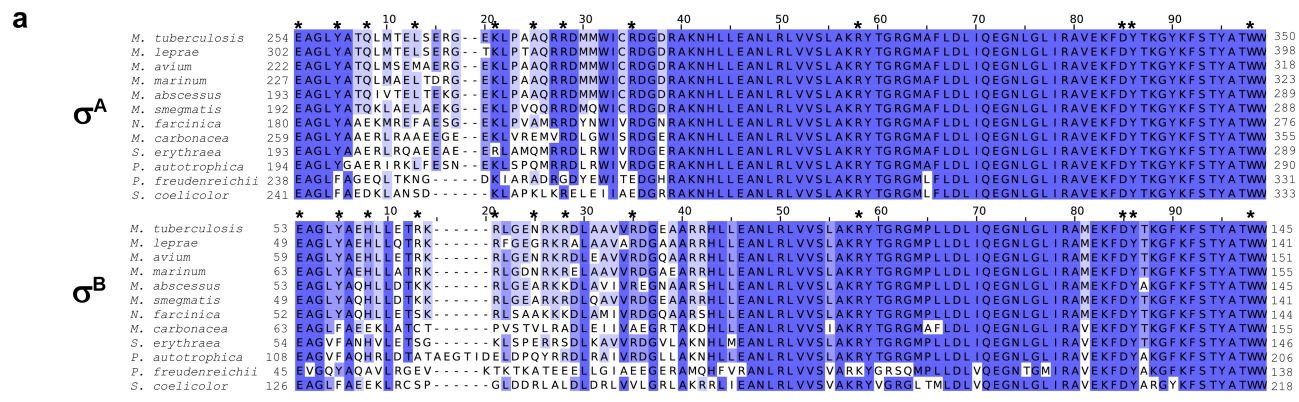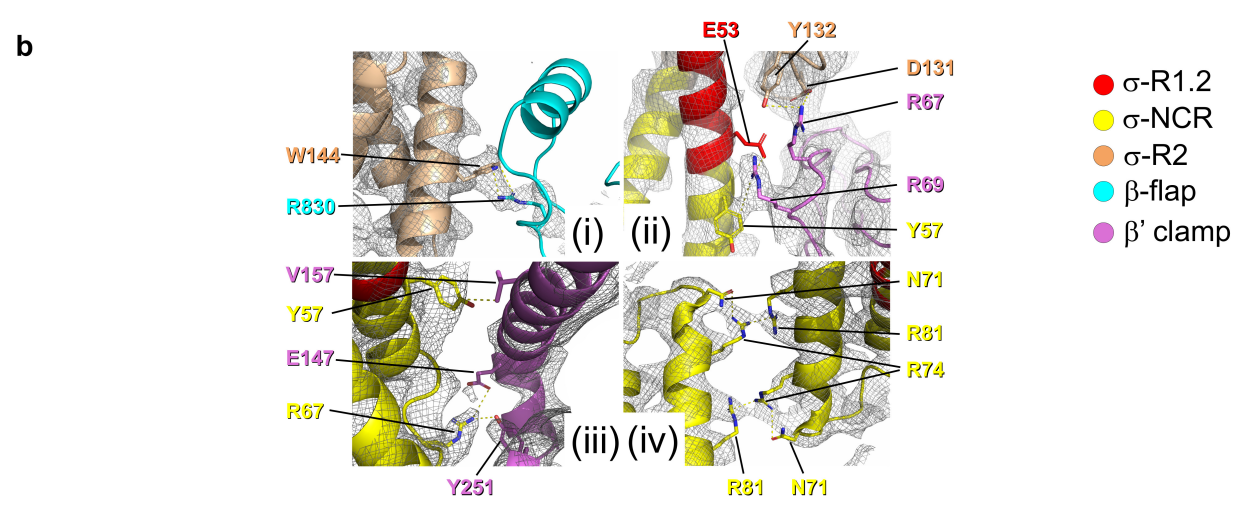

**Supplementary Figure 11. Structure of the octamer-forming interfaces.** **a** Alignment of the representative sequences of the  $\sigma^B$  and  $\sigma^A$  subunits of *Actinobacteria* implicated in interface formation. Asterisks show residues implicated in inter-subunit interactions. Residues are shaded blue according to the blosum62 information score. **b** Views on the inter-subunit interfaces: (i)  $\beta$  flap -  $\sigma^B$ , (ii)  $\beta'$ ZBD -  $\sigma^B$  (iii)  $\beta'$ i1 -  $\sigma^B$ , (iv)  $\sigma^B$ NCR -  $\sigma^B$ NCR. The cryo-EM density is shown as a gray mesh with the superimposed ribbons color coded as indicated on the right. Interacting residues are shown as sticks and labeled.

## Supplementary References

1. Tan, Y. Z. *et al.* Addressing preferred specimen orientation in single-particle cryo-EM through tilting. *Nat. Methods* **14**, 793–796 (2017).
2. Pintilie, G. D., Zhang, J., Goddard, T. D., Chiu, W. & Gossard, D. C. Quantitative analysis of cryo-EM density map segmentation by watershed and scale-space filtering, and fitting of structures by alignment to regions. *J. Struct. Biol.* **170**, 427–438 (2010).
3. Lane, W. J. & Darst, S. A. Molecular Evolution of Multisubunit RNA Polymerases: Structural Analysis. *J. Mol. Biol.* **395**, 686–704 (2010).
