# Supplementary material for: Structural basis of the mycobacterial stress-response RNA polymerase auto-inhibition via oligomerization
Source: PubMed Central journal article supplement (PMC9886945; doi:10.1038/s41467-023-36113-y), 2023-01-30
Supplement: 41467_2023_36113_MOESM3_ESM.pdf [file 41467_2023_36113_MOESM3_ESM.pdf]

### **Description of Additional Supplementary Files**

File Name: Supplementary Movie 1

Description: Oscillation between 3D density maps generated by 3DVA in cryoSPARC. Variability component 0 is shown. Movie was generated in USCF Chimera.
